# Supplementary material for: Expression of PD-L1 and prognosis in breast cancer: a meta-analysis
Source: PubMed Central journal article supplement (PMC5458212; doi:10.18632/oncotarget.15532), 2017-02-20
Supplement: oncotarget-08-31347-s001.pdf [file oncotarget-08-31347-s001.pdf]

## **Expression of PD-L1 and prognosis in breast cancer: a meta-analysis**

### **SUPPLEMENTARY MATERIALS AND METHODS**

#### **Appendix 1: Newcastle-Ottawa quality assessment scale**

See Appendix File 1

#### **Appendix 2: Search strategies for Pubmed, EMBASE and The Cochrane Library database**

See Appendix File 2
